# Supplementary material for: Porous Clay Heterostructure with Alginate Encapsulation for Toluene Removal
Source: MDPI journal article supplement (doi:10.3390/nano11020388), 2021-02-03
Supplement: s1 [file s1]

**Supporting information**

**A Study of optimization using porous clay heterostructure with alginate encapsulation for toluene removal**

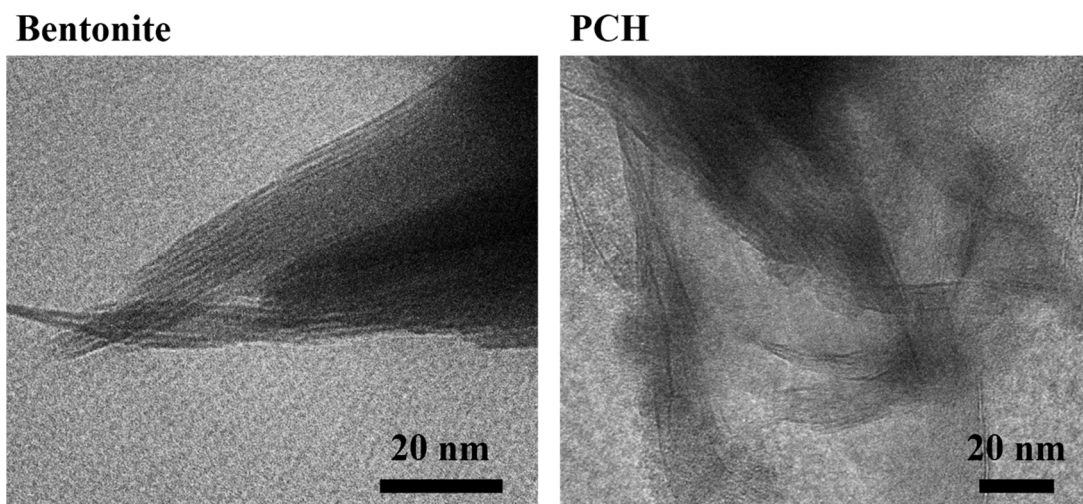

Figure S1. Transmission electron microscopy images of bentonite and PCH.

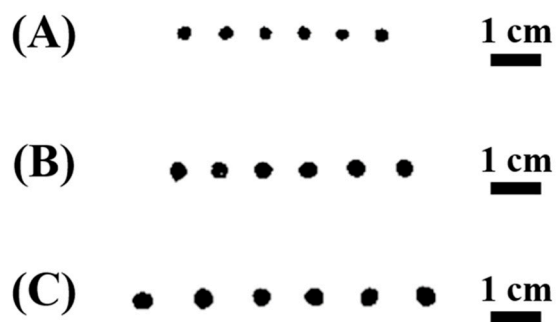

Figure S2. Converted photographs of Alg-PCH prepared by three different extrusion tips (A) 2, (B) 3 and (C) 4 mm with ImageJ software.
